# Supplementary material
Source: Research Square preprint supplement (doi:10.21203/rs.3.rs-9381829/v1)
Supplement: Supplementary file 1 [file 773afe1b9ad2aa38e4398650.pdf]

SUPPLEMENTARY MATERIAL

Table 1. Formuls of parameters evaluated in the validation of this methodology according to ANVISA (2017) and INMETRO (2020).

| Parameters               | Equations                                                                                                                                                                                                                                                                                                                                                                                                                                                                          |
|--------------------------|------------------------------------------------------------------------------------------------------------------------------------------------------------------------------------------------------------------------------------------------------------------------------------------------------------------------------------------------------------------------------------------------------------------------------------------------------------------------------------|
| Limits of Quantification | $LOQ = \frac{10 \times \sigma}{a}$ <p>Where, <math>\sigma</math> is the standard deviation of the replicates of the lowest point of the curves and <math>a</math> the slope of the analytical curve.</p>                                                                                                                                                                                                                                                                           |
| Limits of Detection      | $LOD = \frac{3,3 \times \sigma}{a}$ <p>In which, <math>\sigma</math> is the standard deviation of the replicates of the lowest point of the curves and <math>a</math> the slope of the analytical curve.</p>                                                                                                                                                                                                                                                                       |
| Linearity                | $G < = \left( \frac{C_m - C_{<}}{\sigma} \right)$ $G > = \left( \frac{C_m - C_{>}}{\sigma} \right)$ <p>Where, <math>C_m</math> corresponds to the average absorbance value, <math>C_{&lt;}</math> is the lowest measured value, <math>C_{&gt;}</math> is the largest measured value, <math>\sigma</math> is the standard deviation of the replicates, while <math>G_{&lt;}</math> and <math>G_{&gt;}</math> are respectively the lowest and highest measured absorbance value.</p> |
| Precision                | $CV (\%) = \frac{\sigma}{\bar{c}}$ <p>In which, <math>\sigma</math> = absolute standard deviation estimate value, and <math>\bar{c}</math> represents the average concentration of the analyte.</p>                                                                                                                                                                                                                                                                                |
| Accuracy                 | $Recovery (\%) = \frac{\bar{c}}{c_{theoretical}} \times 100$ <p>Where, <math>\bar{c}</math> is the concentration obtained from the analytical curve and <math>C_{theoretical}</math> is the corresponding theoretical concentration</p>                                                                                                                                                                                                                                            |

Table 2. Validation of the methodology using the Grubbs test (Grubbs; Beck, 1972)

| Concentration mg·L <sup>-1</sup> | UV/Vis |      |
|----------------------------------|--------|------|
|                                  | G<     | G>   |
| 1                                | 1.78   | 1.71 |
| 2                                | 1.80   | 1.57 |
| 3                                | 1.34   | 1.96 |
| 5                                | 1.28   | 1.99 |
| 7                                | 1.15   | 1.24 |
| 10                               | 1.90   | 1.53 |
| 12                               | 1.13   | 1.68 |
| 15                               | 1.16   | 1.03 |
| 20                               | 1.35   | 1.82 |
